# Supplementary material for: Benthic grazing in a eutrophic river: cascading effects of zoobenthivorous fish mask direct effects of herbivorous fish
Source: PeerJ. 2018 Feb 14;6:e4381. doi: 10.7717/peerj.4381 (PMC5816581; doi:10.7717/peerj.4381)
Supplement: Supplemental Information 3 — This file contains absolute and relative invertebrate densities on assessible control tiles and fish exclosure tiles in the three experiments (mean ± SD) and in the river close to site B at the time of experiment III. [file peerj-06-4381-s003.xlsx]

## Sheet: Absolute density
Absolute invertebrate density [individuals m-2]	Experiment I (mean ± SD)		Experiment II (mean ± SD)		Experiment III (mean ± SD)		River sample (Exp. III)
	Exclosure	Control	Exclosure	Control	Exclosure	Control
Total	4993 ± 1735	4554 ± 1725	12005 ± 8042	5767 ± 3938	23401 ± 10580	12146 ± 5340	8642
Diptera
Chironomidae	2892 ± 1286	3218 ± 1476	10475 ±7361	4382 ± 3445	9241 ± 6730	7670 ± 3526	3779
Antocha sp.	130 ± 123	39 ± 59	23 ± 22	5 ± 7	1553 ± 748	1425 ± 546	96
Simulium sp.	23 ± 44	9 ± 19	209 ± 365	25 ± 49	69 ± 64	16 ± 13	196
Atherix ibis	6 ± 7	23 ± 27	39 ± 14	35 ± 40	6 ± 12	3 ± 6	50
Dixa sp.	1 ± 4	0	0	0	0	0	0
Empididae	0	0	0	0	0	0	0
Ibisia marginata	0	0	0	10 ± 28	0	0	0
Limnophora sp.	3 ± 9	0	0	0	0	0	0
Ephemeroptera
Baetis spp.	481 ± 379	317 ± 339	340 ± 398	123 ± 92	1262 ± 657	136 ± 81	1071
Ephemerella ignita	241 ± 202	129 ± 113	340 ± 130	311 ± 270	123 ±79	45 ± 25	367
Ecdyonurus spp.	4 ± 7	10 ± 11	25 ± 16	21 ± 22	0	3 ± 9	8
Caenis sp.	1 ± 4	0	5 ± 7	8 ± 14	0	0	4
Ephemera sp.	0	0	0	2 ± 5	0	0	0
Habrophlebia lauta	0	1 ± 4	5 ± 10	3 ± 6	0	0	0
Coleoptera
Elmis sp.	42 ± 34	44 ± 34	25 ± 31	39 ± 31	66 ± 41	48 ± 29	271
Esolus parallelepipedus	4 ± 9	0	3 ± 6	3 ± 6	1 ± 4	1 ± 4	8
Limnius sp.	3 ± 9	1 ± 4	3 ± 6	3 ± 6	0	0	29
Oulimnius sp.	10 ± 23	6 ± 13	13 ± 16	0	10 ± 14	12 ± 21	67
Trichoptera
Micrasema minimum	367 ± 306	170 ± 174	63 ± 76	36 ± 31	9560 ± 6173	2137 ± 1808	1563
Psychomyia pusilla	41 ± 23	32 ± 30	25 ± 35	7 ± 14	146 ± 165	95 ± 95	50
Rhyacophila sensu stricto	53 ± 61	38 ± 44	15 ± 20	2 ± 5	104 ± 50	13 ± 11	29
Hydropsyche spp.	32 ± 43	31 ± 34	10 ± 9	21 ± 34	6 ± 10	13 ± 16	188
Brachycentrus sp.	6 ± 12	3 ± 6	31 ± 31	8 ± 10	0	0	42
Hydroptila sp.	10 ± 9	1 ± 4	3 ± 9	0	702 ± 767	41 ± 33	4
Agapetus fuscipes	1 ± 4	1 ± 4	0	0	0	0	8
Lepidostoma hirtum	0	0	67 ± 90	33 ± 24	0	0	0
Polycentropodidae	0	7 ± 18	0	0	29 ± 43	57 ± 106	0
Polycentropus flavomaculatus	3 ± 6	0	3 ± 6	3 ± 6	0	0	0
Sericostoma sp.	0	1 ± 4	0	2 ± 5	0	0	4
Allogamus auricollis	0	0	0	2 ± 5	0	0	0
Athripsodes albifrons	0	0	3 ± 6	0	0	0	0
Ceraclea sp.	0	0	0	2 ± 5	0	0	0
Chaetopteryx villosa	0	0	0	2 ± 5	0	0	0
Cheumatopsyche sp.	0	0	0	2 ± 5	0	0	0
Ecnomus sp.	4 ± 7	0	5 ± 10	0	10 ± 22	6 ± 13	25
Glossosoma sp.	0	0	0	0	0	1 ± 4	0
Goera pilosa	0	1 ± 4	0	0	1 ± 4	1 ± 4	0
Goeridae	1 ± 4	6 ± 10	0	0	0	0	0
Mystacides azurea	0	0	2 ± 5	0	0	0	0
Plecoptera
Leuctra spp.	7 ± 10	3 ± 6	10 ± 15	13 ± 16	0	0	217
Gastropoda
Ancylus fluviatilis	12 ± 12	7 ± 15	3 ± 6	0	1 ± 4	9 ± 11	154
Radix sp.	0	0	0	0	0	0	4
Crustacea
Gammarus sp.	0	0	0	0	1 ± 4	1 ± 4	13
Jaera istri	0	0	2 ± 5	2 ± 5	0	0	0
Ostracoda	0	0	12 ± 33	0	0	0	0
Hirudinea
Erpobdella octoculata	0	0	0	0	0	3 ± 6	13
Helobdella stagnalis	0	1 ± 4	0	41 ± 116	0	0	0
Oligochaeta	19 ± 31	12 ± 18	51 ± 60	199 ± 249	10 ± 18	31 ± 42	208
Eiseniella tetraeda	0	0	0	0	0	0	4
Nematomorpha	0	0	0	5 ± 14	0	0	0
Hydrachnidiae	592 ± 358	439 ± 314	194 ± 81	113 ± 106	499 ± 215	377 ± 226	171

## Sheet: Relative density
Relative invertebrate density [%]	Experiment I (mean ± SD)		Experiment II (mean ± SD)		Experiment III (mean ± SD)		River sample (Exp. III)
	Exclosure	Control	Exclosure	Control	Exclosure	Control
Diptera
Chironomidae	57 ± 9	68 ± 13	86 ± 5	78 ± 9	37 ± 23	63 ± 11	44
Antocha sp.	3 ± 2	1 ± 1	< 1	< 1	8 ± 6	12 ± 3	1
Simulium sp.	< 1	< 1	1 ± 2	< 1	< 1	< 1	2
Atherix ibis	< 1	1 ± 1	< 1	1 ± 1	< 1	< 1	1
Dixa sp.	< 1	0	0	0	0	0	0
Empididae	0	0	0	0	0	0	0
Ibisia marginata	0	0	0	< 1	0	0	0
Limnophora sp.	< 1	0	0	0	0	0	0
Ephemeroptera
Baetis spp.	10 ± 7	8 ± 10	3 ± 2	3 ± 2	7 ± 5	1 ± 1	12
Ephemerella ignita	5 ± 4	3 ± 3	4 ± 2	6 ± 5	1 ± 0	1 ± 1	4
Ecdyonurus spp.	< 1	< 1	< 1	1 ± 1	0	< 1	< 1
Caenis sp.	< 1	0	< 1	< 1	0	0	< 1
Ephemera sp.	0	0	0	< 1	0	0	0
Habrophlebia lauta	0	< 1	< 1	< 1	0	0	0
Coleoptera
Elmis sp.	1 ± 1	1 ± 1	< 1	1 ± 1	< 1	< 1	3
Esolus parallelepipedus	< 1	0	< 1	< 1	< 1	< 1	< 1
Limnius sp.	< 1	< 1	< 1	< 1	0	0	< 1
Oulimnius sp.	< 1	< 1	< 1	0	< 1	< 1	1
Trichoptera
Micrasema minimum	7 ± 4	3 ± 2	1 ± 1	1 ± 1	40 ± 19	17 ± 8	18
Psychomyia pusilla	1 ± 1	1 ± 1	< 1	< 1	1 ± 1	1 ± 1	1
Rhyacophila sensu stricto	1 ± 1	1 ± 1	< 1	< 1	< 1	< 1	< 1
Hydropsyche spp.	1 ± 1	1 ± 1	< 1	1 ± 1	< 1	< 1	2
Brachycentrus sp.	< 1	< 1	< 1	< 1	0	0	< 1
Hydroptila sp.	< 1	< 1	< 1	0	3 ± 2	< 1	< 1
Agapetus fuscipes	< 1	< 1	0	0	0	0	< 1
Lepidostoma hirtum	0	0	1 ± 1	1 ± 1	0	0	0
Polycentropodidae	0	< 1	0	0	< 1	< 1	0
Polycentropus flavomaculatus	< 1	0	< 1	< 1	0	0	0
Sericostoma sp.	0	< 1	0	< 1	0	0	< 1
Allogamus auricollis	0	0	0	< 1	0	0	0
Athripsodes albifrons	0	0	< 1	0	0	0	0
Ceraclea sp.	0	0	0	< 1	0	0	0
Chaetopteryx villosa	0	0	0	< 1	0	0	0
Cheumatopsyche sp.	0	0	0	< 1	0	0	0
Ecnomus sp.	< 1	0	< 1	0	< 1	< 1	< 1
Glossosoma sp.	0	0	0	0	0	< 1	0
Goera pilosa	0	< 1	0	0	< 1	< 1	0
Goeridae	< 1	< 1	0	0	0	0	0
Mystacides azurea	0	0	< 1	0	0	0	0
Plecoptera
Leuctra spp.	< 1	< 1	< 1	< 1	0	0	3
Gastropoda
Ancylus fluviatilis	< 1	< 1	< 1	0	< 1	< 1	2
Radix sp.	0	0	0	0	0	0	< 1
Crustacea
Gammarus sp.	0	0	0	0	< 1	< 1	< 1
Jaera istri	0	0	< 1	< 1	0	0	0
Ostracoda	0	0	< 1	0	0	0	0
Hirudinea
Erpobdella octoculata	0	0	0	0	0	< 1	< 1
Helobdella stagnalis	0	< 1	0	< 1	0	0	0
Oligochaeta	19 ± 31	12 ± 18	51 ± 60	199 ± 249	10 ± 18	31 ± 42	208
Eiseniella tetraeda	0	0	0	0	0	0	4
Nematomorpha	0	0	0	5 ± 14	0	0	0
Hydrachnidiae	592 ± 358	439 ± 314	194 ± 81	113 ± 106	499 ± 215	377 ± 226	171
